# Supplementary material for: Multilayered silica-biopolymer nanocapsules with a hydrophobic core and a hydrophilic tunable shell thickness
Source: Royal Society of Chemistry journal article supplement (doi:10.1039/c6nr01192f), 2016-01-01
Supplement: c6nr01192f3.pdf [file c6nr01192f3.pdf]

## Supplementary Information

# Multilayered silica-biopolymer nanocapsules with hydrophobic core and hydrophilic tunable shell thickness

**Raffaele Vecchione<sup>1,2</sup>, Giuseppina Luciani<sup>2,3</sup>, Vincenzo Calcagno<sup>1,2</sup>, Anshuman Jakhmola<sup>1</sup>, Brigida Silvestri<sup>3</sup>, Daniela Guarnieri<sup>1,2</sup>, Valentina Belli<sup>1,2</sup>, Aniello Costantini<sup>2,3</sup>, Paolo A. Netti<sup>1,2</sup>**

<sup>1</sup> *Istituto Italiano di Tecnologia, IIT@CRIB, Largo Barsanti e Matteucci, 53 80125 Napoli, Italy*

<sup>2</sup> *Centro di Ricerca Interdipartimentale sui Biomateriali CRIB, Università di Napoli Federico II, Piazzale Tecchio, 80 80125 Napoli, Italy*

<sup>3</sup> *Dipartimento di Ingegneria Chimica dei Materiali e della Produzione Industriale, Università di Napoli Federico II, Piazzale Tecchio, 80 80125 Napoli, Italy*

Corresponding author: [paolo.netti@iit.it](mailto:paolo.netti@iit.it)

*Both authors Raffaele Vecchione and Giuseppina Luciani have equally contributed to this work*

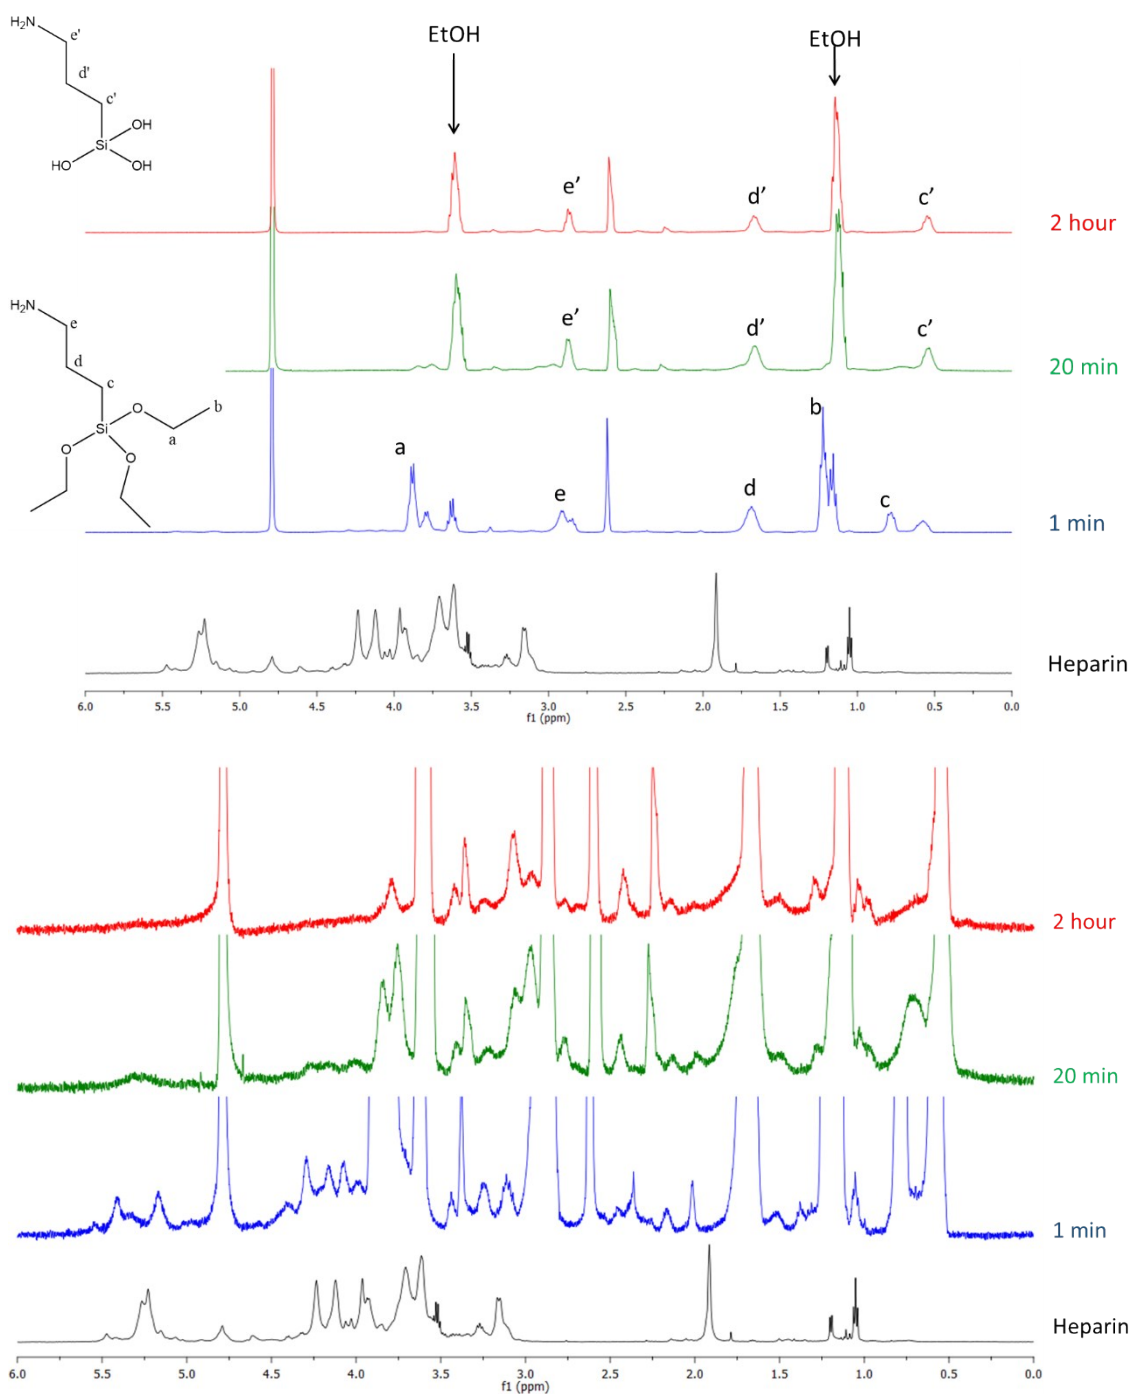

**Figure S1** (a) <sup>1</sup>H-NMR spectra of heparin (black line) and of the reacting mixture (heparin, EDC, NHS and APTS) at 3 different times. Mixture was kept at 4° C. (b) Expanded <sup>1</sup>H-NMR spectra showing the characteristic heparin signals.

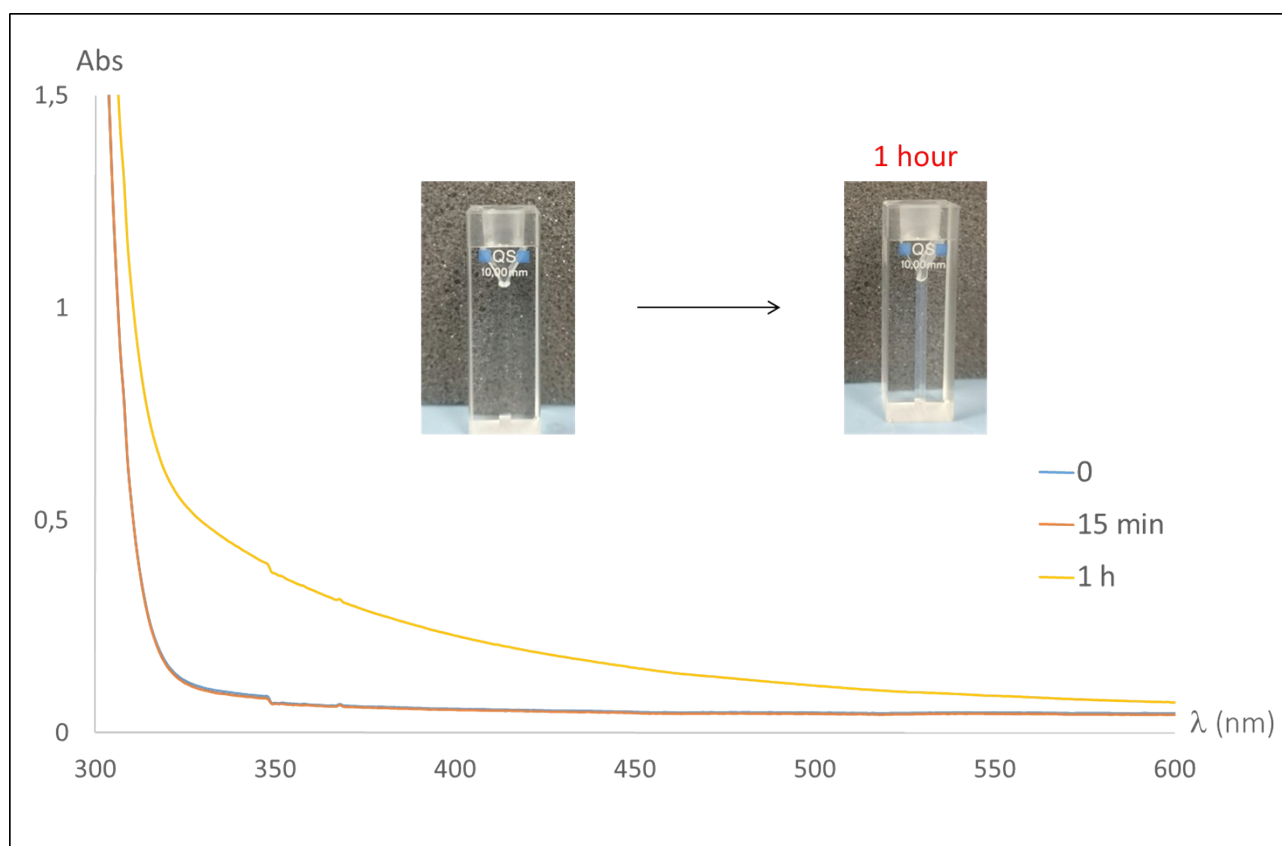

**Figure S2** UV-Vis spectra of reaction mixture containing heparin, EDC, NHS and APTS at different times (blue and red line are overlapped). In the inset, the reaction batch just mixed and after 1 h are compared, thus showing the appearance of opalescence in the solution.

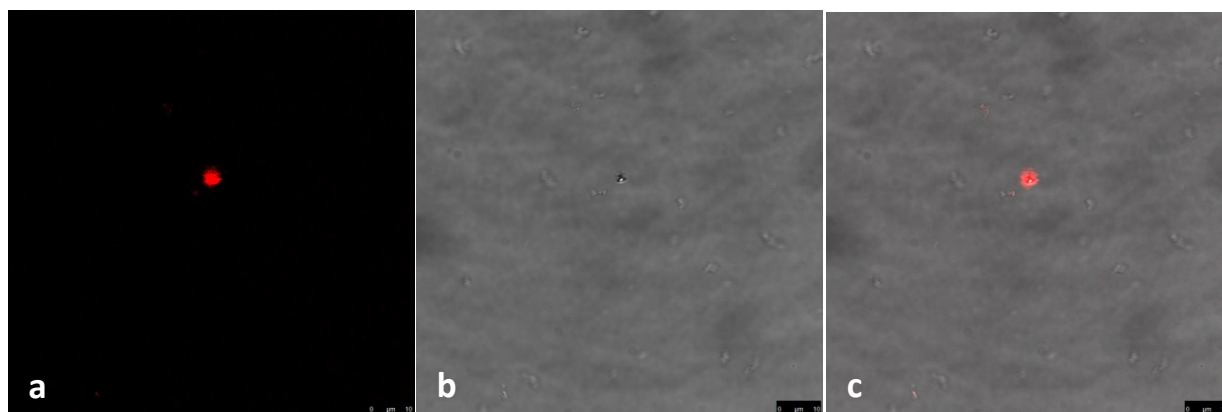

**Figure S3** Confocal analysis of nanocapsules stained with Nile Red in the oil core: in fluorescence analysis (a), in bright field (b); matching of the two images.

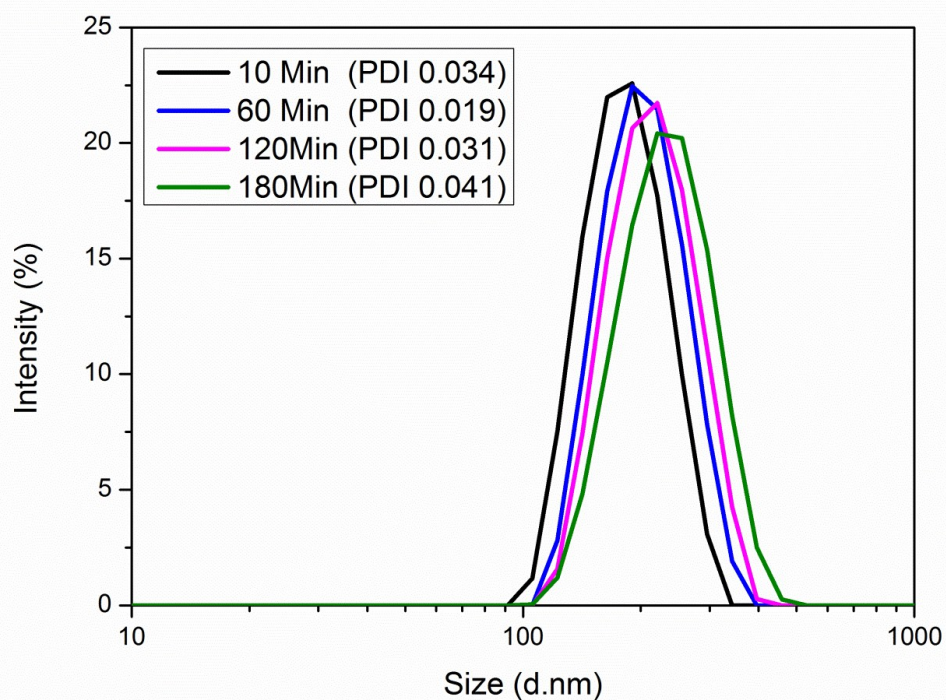

**Figure S4** DLS graph of silica nanocapsules collected at different reaction time intervals.

**Table S1.** DLS data of silica nanocapsules collected at different reaction time intervals.

| Time (min) | Size 1 (nm) | PDI   | Size 2 (nm) | PDI   | Size 3 (nm) | PDI   |
|------------|-------------|-------|-------------|-------|-------------|-------|
| 7,5        | 153,3       | 0,042 | 152,3       | 0,036 | 153,9       | 0,031 |
| 15         | 165,1       | 0,028 | 161,2       | 0,015 | 161,9       | 0,057 |
| 30         | 175,4       | 0,019 | 172,2       | 0,017 | 173,0       | 0,045 |
| 45         | 182,3       | 0,044 | 181,0       | 0,018 | 176,9       | 0,042 |
| 60         | 187,8       | 0,043 | 186,9       | 0,037 | 185,5       | 0,035 |
| 90         | 198,7       | 0,036 | 199,1       | 0,022 | 195,9       | 0,055 |
| 120        | 198,4       | 0,060 | 203,6       | 0,050 | 203,9       | 0,030 |
| 150        | 203,8       | 0,054 | 209,4       | 0,036 | 204,5       | 0,054 |
| 180        | 205,7       | 0,045 | 209,8       | 0,044 | 209,8       | 0,057 |

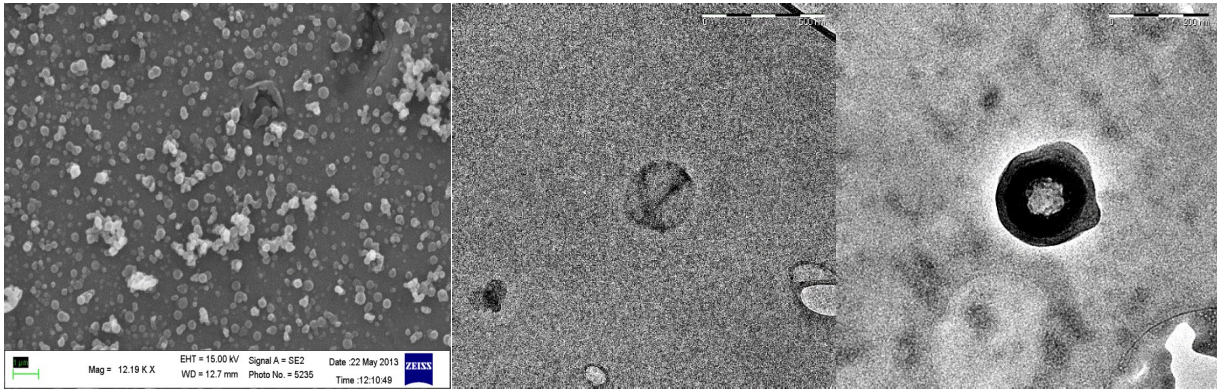

**Figure S5** SEM micrographs (a) of silica nanocapsules after 1 h of seeded growth; TEM tomography of a single silica nanocapsule after 1h (scale bar 500 nm) (b) and 3h (scale bar 200 nm) (c) of seeded growth.

**Video S5** TEM tomography of a single silica nanocapsule after 1h (a) and 3h (b) of reaction time

- 1) Video S5a
- 2) Video S5b

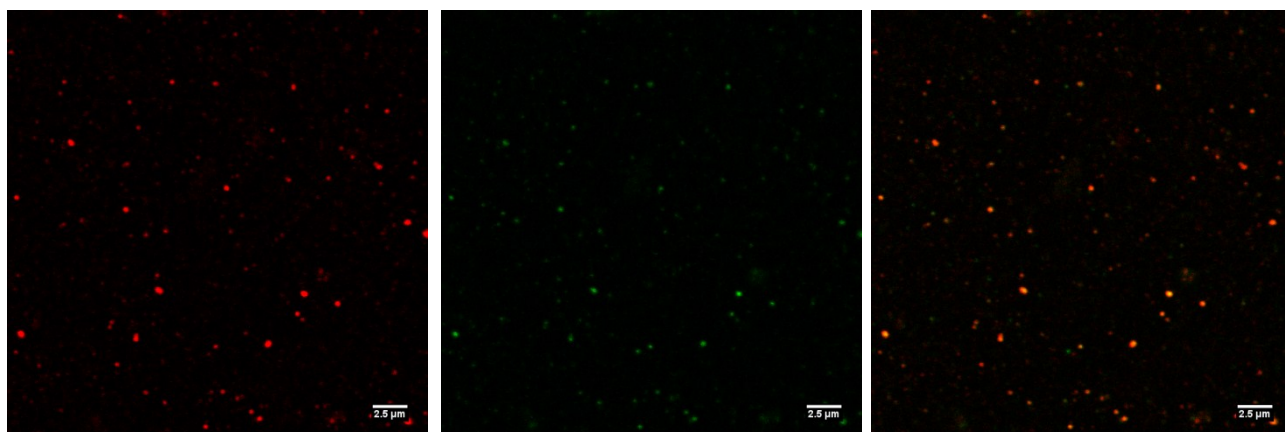

**Figure S6** Confocal image of silica nanocapsules by exciting sulforhodamine B in the shell (a) and FITC on the chitosan (b) and the overlapped image of a and b (c).

## External sink release method

Silica nanocapsules (2 ml) were collected during silica deposition process (30, 60, 180 min of seeded growth time) to get different shell diameters and placed in vials. In each of the vials 2 ml hexane was added and the samples were stirred vigorously at 1500 rpm. After predetermined times hexane layer was collected and analyzed by UV-vis spectroscopy for the absorbance of soybean oil between 200-300 nm and then replaced back. With the growth of silica shell the release of soybean oil diminished and in case of thick silica shell (after 180 min of seeded growth time) only a slight increase in absorbance was observed with time even after 8 h of rigorous stirring.

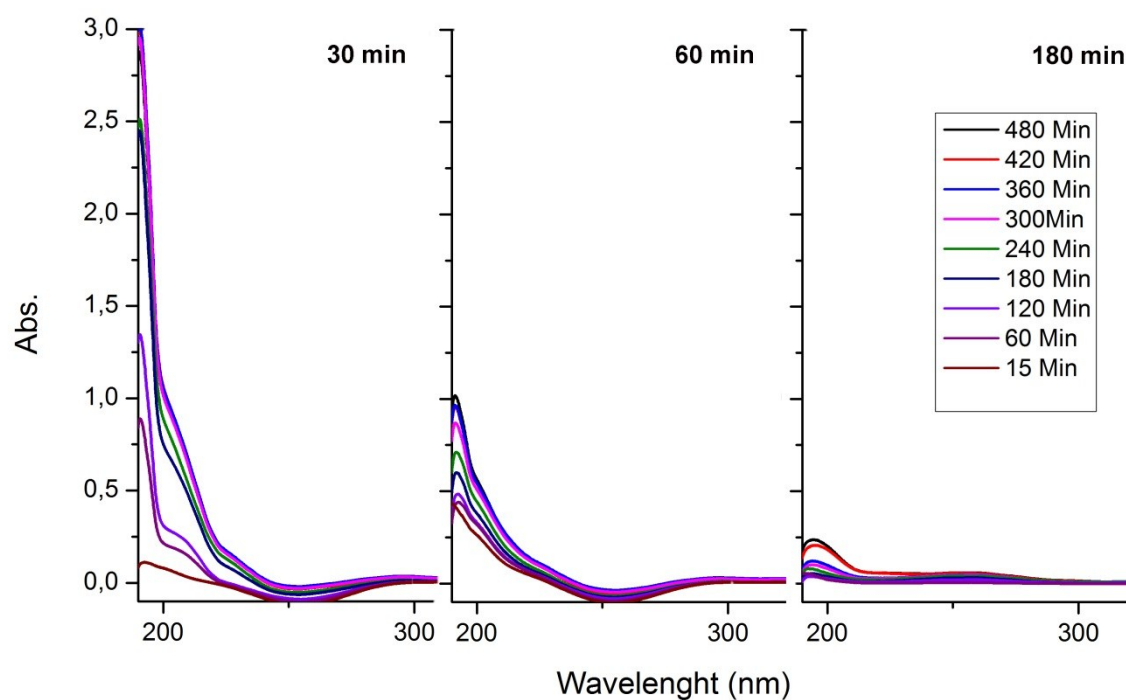

**Figure S7** UV absorbance of soybean oil released from nanocapsules at different silica shell thickness (corresponding to 30, 60 and 180 min of seeded growth time) over stirring time in the mixture with hexane.



## Synthesis of Fluorescein PEG

PEG<sub>5000</sub>-COOH (Methoxypolyethylene glycol 5000 acetic acid, 90.0 mg) and NHS (12.0 mg) were dissolved in 2.50 ml of MilliQ water. After 10 min EDC (10.0 mg) was added. In the meantime, 7.0 mg of 6-Aminofluorescein were dissolved in 100 µl of DMSO. After 30 min the fluorescein solution was added dropwise to the PEG<sub>5000</sub>-COOH solution. pH was corrected to 6.7 adding NaOH 1 M. After 24 h the solution was dialyzed (dialysis tubing RCE, 3.5 kDa MWCO) against Milli Q water to remove solvent and unreacted reactants and freeze dried. An absorbance spectrum was recorded in order to select the correct excitation wavelength (480 nm) and, then, the emission spectrum was recorded between 500 and 600 nm using an excitation wavelength of 480 nm and a flashes number of 1000 (Figure S6).

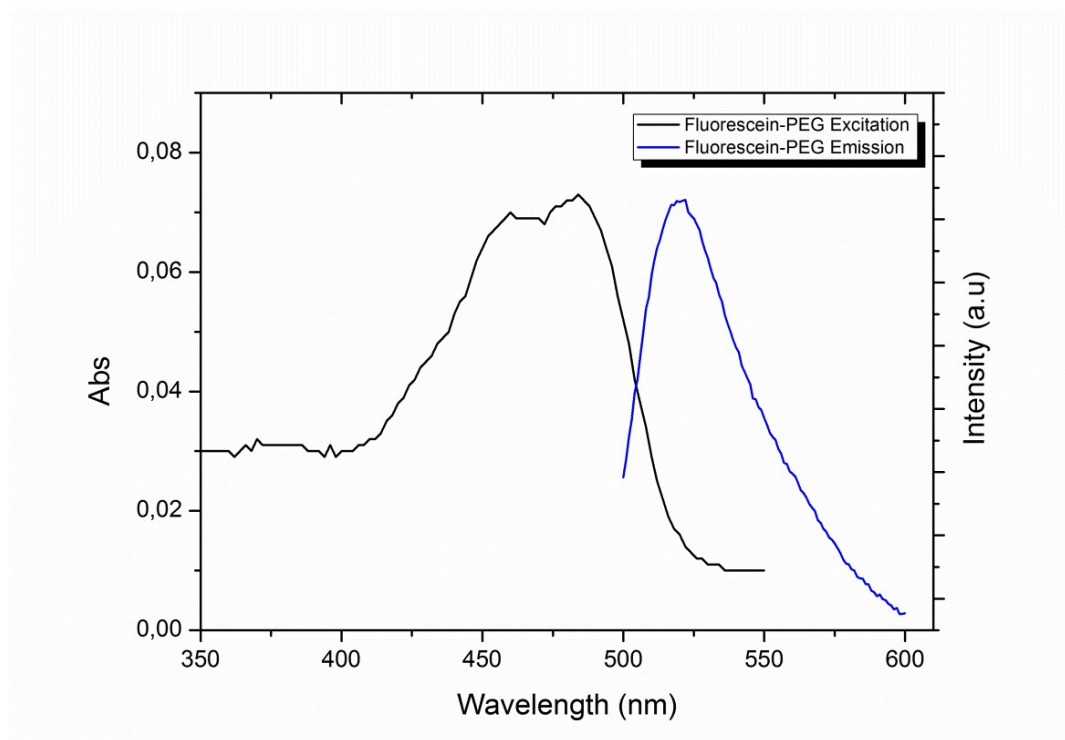

**Figure S8** Excitation (black curve) and emission (blue curve) spectrum for FA modified PEG<sub>5000</sub>-COOH.

## Spectrofluorimetry Analysis and Confocal imaging of PEGylated nanocapsules

To confirm that shell PEGylation occur an experiment was performed using the FA modified PEG described in the previous paragraph. The so obtained marked sample was dialyzed (Dialysis tubing, RC, 25 kDa MWCO) against water to remove the excess of PEG<sub>5000</sub>-COOH and dialysis was monitored recording the fluorescent emission of fluorescein in the washing water (EnSpire Multimode Plate Reader 2300-0000, Perkin Elmer). 10  $\mu$ l of NaOH solution 1 M were added to 300  $\mu$ l of water and loaded in a multi-well (3 replicates for each sample were prepared) and irradiated with a light source at 480 nm. Dialysis is kept until no significant emission is recorded in the water, also after sonication of the sample. Moreover, to show that PEG-FA is still present on the sample and, in particular on the shell, an emission spectrum of sample was recorded (10  $\mu$ l of sample were added to 10  $\mu$ l of NaOH solution 1 M and dilute to 300  $\mu$ l, Figure S9) together with a confocal images of silica nanocapsules with Nile Red in the core and PEG-FA on the shell surface (Figure S10).

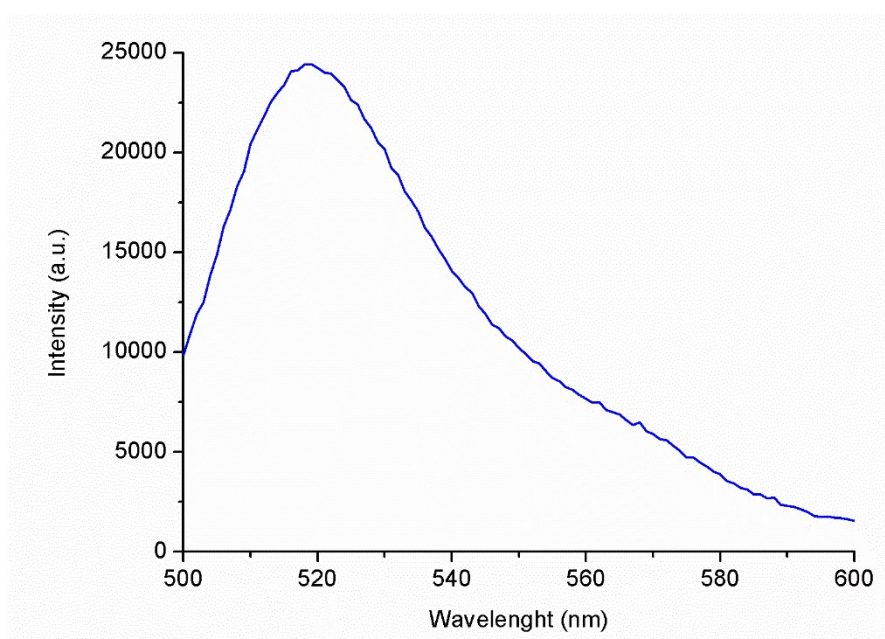

**Figure S9** Emission spectra of silica nanocapsules coated with FA-labeled PEG<sub>5000</sub>-COOH after dialysis.

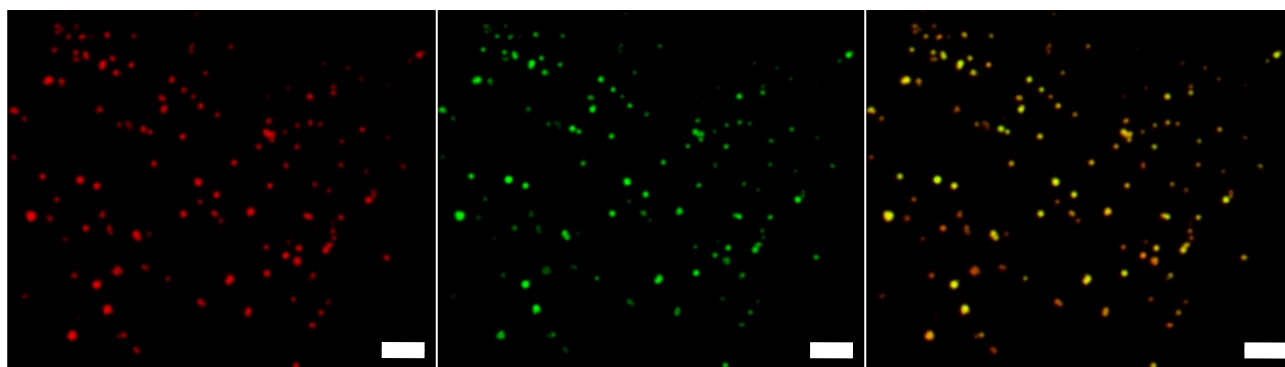

**Figure S10** Confocal image of silica nanocapsules by exciting Nile Red in the oil core (a) and PEG-FA on the shell (b) and the overlapped image of a and b (c). Scale bar 2.5  $\mu\text{m}$ .

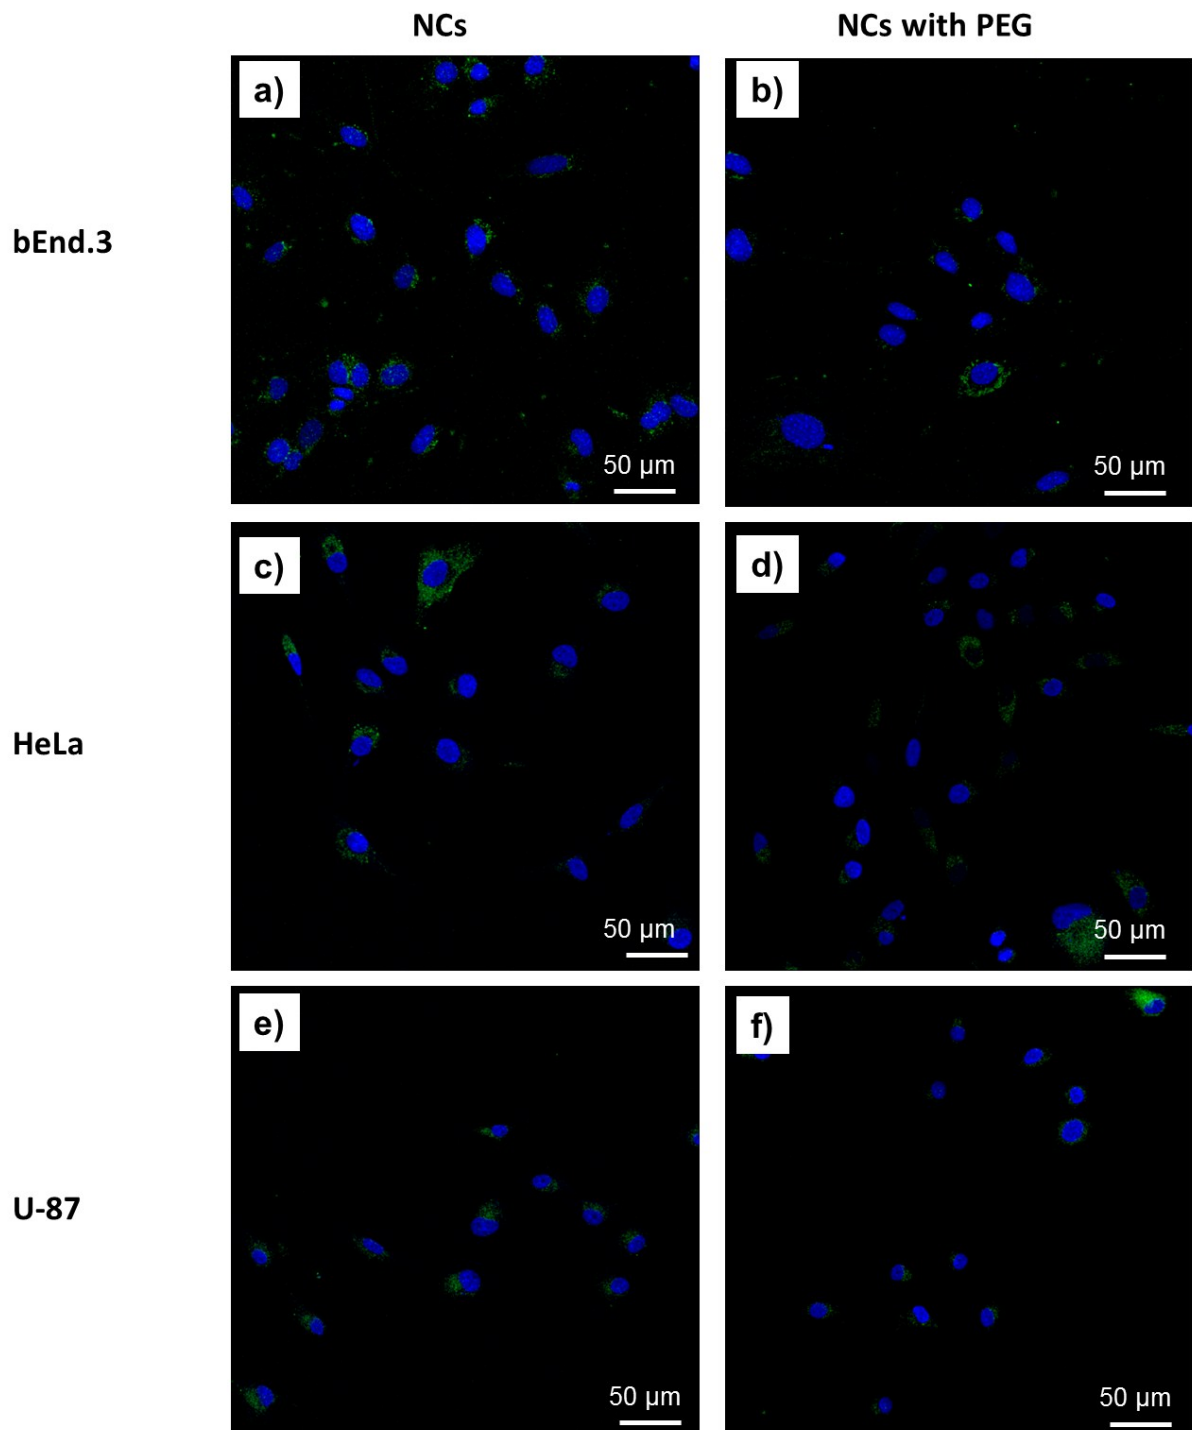

**Figure S11** Confocal images of bEnd.3 (a and b), HeLa (c and d) and U87 (e and f) cells incubated with FITC-doped nanocapsules and PEGylated nanocapsules at the final concentration of 14.2  $\mu\text{g/ml}$  for 2 h at 37  $^{\circ}\text{C}$ .

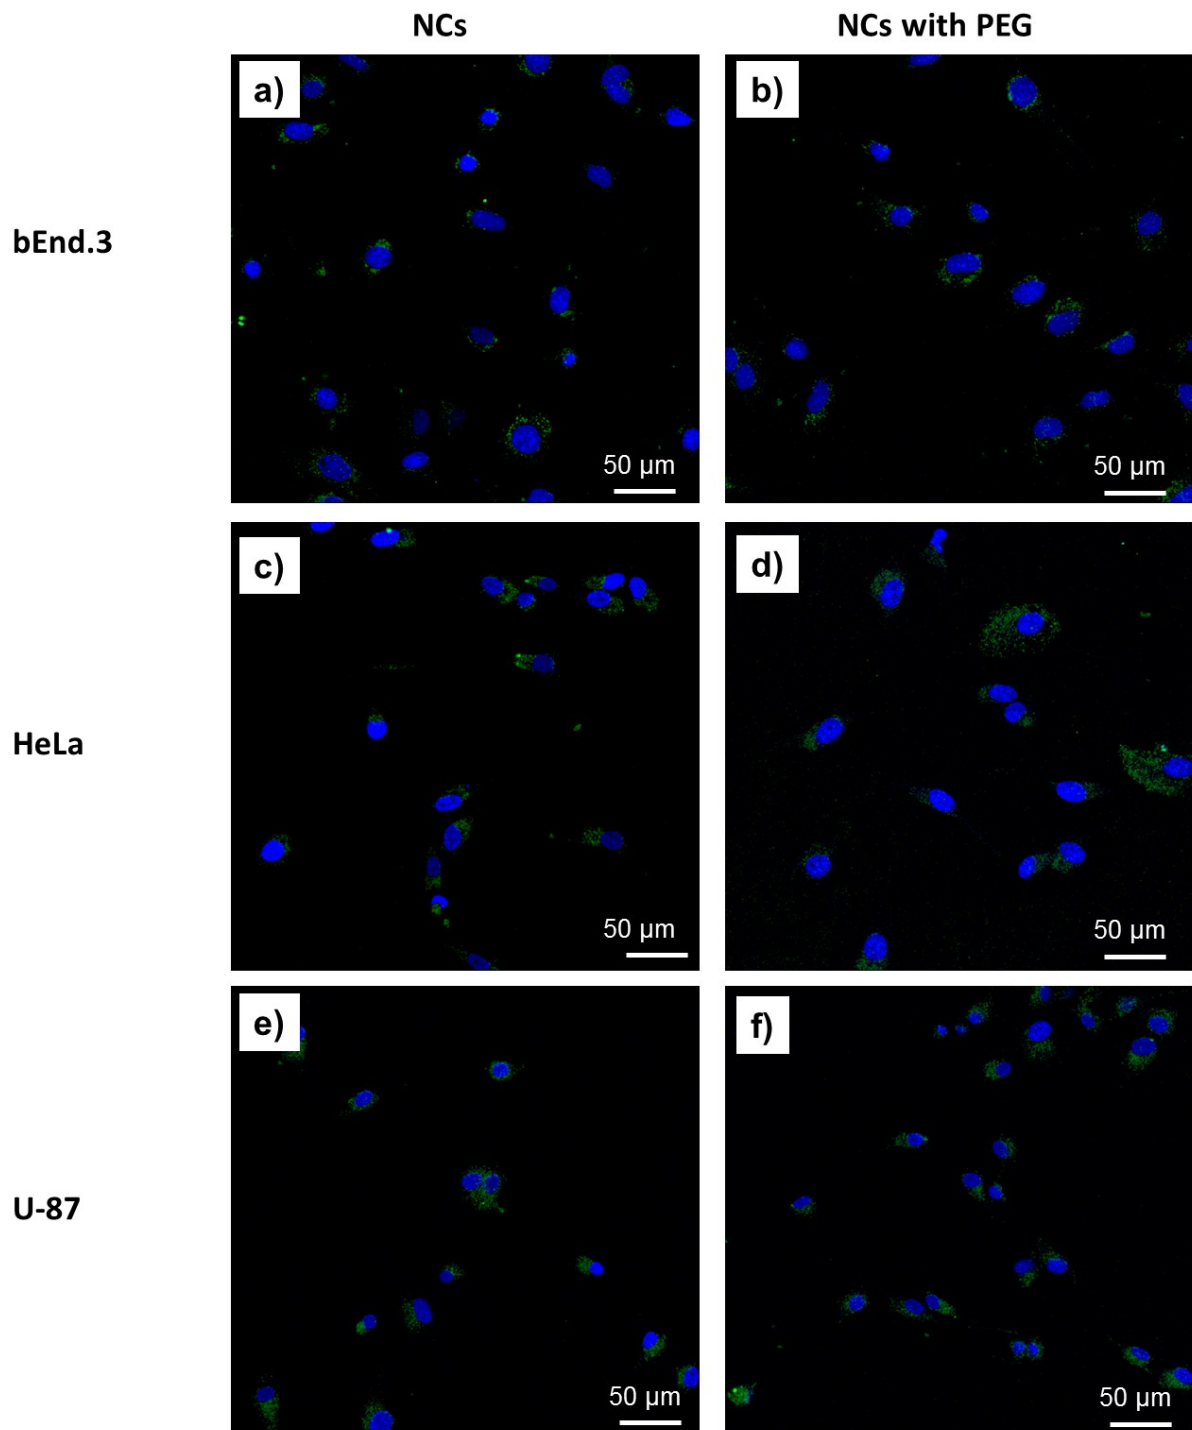

**Figure S12** Confocal images of bEnd.3 (a and b), HeLa (c and d) and U87 (e and f) cells incubated with FITC-doped nanocapsules and PEGylated nanocapsules at the final concentration of 14.2  $\mu\text{g/ml}$  for 4 h at 37  $^{\circ}\text{C}$ .
